# Supplementary material for: Metabolism and Development during Conidial Germination in Response to a Carbon-Nitrogen-Rich Synthetic or a Natural Source of Nutrition in Neurospora crassa
Source: PubMed Central journal article supplement (PMC6437048; doi:10.1128/mbio.00192-19), 2019-03-26

Fig. S2

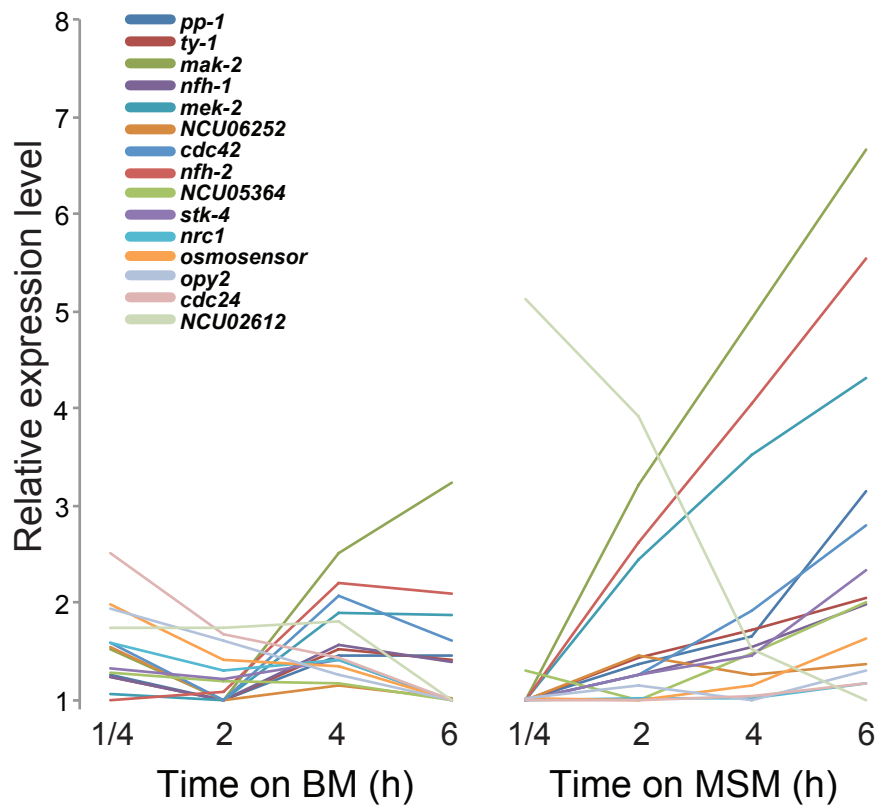

Supplement: mBio.00192-19-sf002.pdf [file mBio.00192-19-sf002.pdf]
